# Supplementary material for: Conceptualizing the Contextual Dynamics of Safety Climate and Safety Culture Research: A Comparative Scientometric Analysis
Source: MDPI journal article supplement (doi:10.3390/ijerph19020813), 2022-01-12
Supplement: s1 [file s1]

# Supplemental Material Table

Table S1. Highest cited papers on safety climate (ranked by publication year).

| Authors                                                                                                                     | Title                                                                                                                                                     | Journal                                                 | Year | Cit_Score |
|-----------------------------------------------------------------------------------------------------------------------------|-----------------------------------------------------------------------------------------------------------------------------------------------------------|---------------------------------------------------------|------|-----------|
| Zohar, D                                                                                                                    | Safety climate in industrial-organizations - theoretical and applied implications                                                                         | <i>Journal of Applied Psychology</i>                    | 1980 | 247       |
| Brown, Rl; Holmes, H                                                                                                        | The use of a factor-analytic procedure for assessing the validity of an employee safety climate model                                                     | <i>Accident Analysis and Prevention</i>                 | 1986 | 67        |
| Dedobbeleer, N; Beland, F                                                                                                   | A Safety Climate Measure for Construction Sites                                                                                                           | Journal of Safety Research                              | 1991 | 87        |
| Niskanen, T                                                                                                                 | Safety climate in the road administration                                                                                                                 | Safety Science                                          | 1994 | 34        |
| Coyle, Ir; Sleeman, Sd; Adams, N                                                                                            | Safety climate                                                                                                                                            | Journal of Safety Research                              | 1995 | 53        |
| Diaz, Ri; Cabrera, Dd                                                                                                       | Safety climate and attitude as evaluation measures of organizational safety                                                                               | Accident Analysis and Prevention                        | 1997 | 33        |
| Williamson, Am; Feyer, Am; Cairns, D; Biancotti, D                                                                          | The development of a measure of safety climate: the role of safety perceptions and attitudes                                                              | Safety Science                                          | 1997 | 40        |
| Hofmann, Da; Stetzer, A                                                                                                     | The role of safety climate and communication in accident interpretation: implications for learning from negative events                                   | Academy of Management Journal                           | 1998 | 27        |
| Mearns, K; Flin, R; Gordon, R; Fleming, M                                                                                   | Measuring safety climate on offshore installations                                                                                                        | Work and Stress                                         | 1998 | 47        |
| Cheyne, A; Cox, S; Oliver, A; Tomas, Jm                                                                                     | Modelling safety climate in the prediction of levels of safety activity                                                                                   | Work and Stress                                         | 1998 | 54        |
| Varonen, U; Mattila, M                                                                                                      | The safety climate and its relationship to safety practices, safety of the work environment and occupational accidents in eight wood-processing companies | Accident Analysis and Prevention                        | 2000 | 40        |
| Zohar, D                                                                                                                    | A group-level model of safety climate: testing the effect of group climate on microaccidents in manufacturing jobs                                        | Journal of Applied Psychology                           | 2000 | 141       |
| Gershon, Rrm; Karkashian, Cd; Grosch, Jw; Murphy, Lr; Escamilla-Cejudo, A; Flanagan, Pa; Bernacki, E; Kasting, C; Martin, L | Hospital safety climate and its relationship with safe work practices and workplace exposure incidents                                                    | American Journal of Infection Control                   | 2000 | 44        |
| Neal, A; Griffin, Ma; Hart, Pm                                                                                              | The impact of organizational climate on safety climate and individual behavior                                                                            | Safety Science                                          | 2000 | 123       |
| Flin, R; Mearns, K; O'connor, P; Bryden, R                                                                                  | Measuring safety climate: identifying the common features                                                                                                 | Safety Science                                          | 2000 | 149       |
| Glendon, Ai; Litherland, Dk                                                                                                 | Safety climate factors, group differences and safety behaviour in road construction                                                                       | Safety Science                                          | 2001 | 64        |
| Mearns, K; Whitaker, Sm; Flin, R                                                                                            | Benchmarking safety climate in hazardous environments: a longitudinal, interorganizational approach                                                       | Risk Analysis                                           | 2001 | 25        |
| Mohamed, S                                                                                                                  | Safety climate in construction site environments                                                                                                          | Journal of Construction Engineering And Management-ASCE | 2002 | 40        |
| Gillen, M; Baltz, D; Gassel, M; Kirsch, L; Vaccaro, D                                                                       | Perceived safety climate, job demands, and coworker support among union and nonunion injured construction workers                                         | Journal of Safety Research                              | 2002 | 62        |

| Authors                                                        | Title                                                                                                                                          | Journal                                                 | Year | Cit_Score |
|----------------------------------------------------------------|------------------------------------------------------------------------------------------------------------------------------------------------|---------------------------------------------------------|------|-----------|
| Zohar, D                                                       | The effects of leadership dimensions, safety climate, and assigned priorities on minor injuries in work groups                                 | Journal of Organizational Behavior                      | 2002 | 56        |
| Mearns, K; Whitaker, Sm; Flin, R                               | Safety climate, safety management practice and safety performance in offshore environments                                                     | Safety Science                                          | 2003 | 68        |
| Hofmann, Da; Morgeson, Fp; Gerras, Sj                          | Climate as a moderator of the relationship between leader-member exchange and content specific citizenship: safety climate as an exemplar      | Journal of Applied Psychology                           | 2003 | 48        |
| Siu, Ol; Phillips, Dr; Leung, Tw                               | Safety climate and safety performance among construction workers in hong kong - the role of psychological strains as mediators                 | Accident Analysis and Prevention                        | 2004 | 59        |
| Dejoy, Dm; Schaffer, Bs; Wilson, Mg; Vandenberg, Rj; Butts, Mm | Creating safer workplaces: assessing the determinants and role of safety climate                                                               | Journal of Safety Research                              | 2004 | 49        |
| Seo, Dc; Torabi, Mr; Blair, Eh; Ellis, Nt                      | A cross-validation of safety climate scale using confirmatory factor analytic approach                                                         | Journal of Safety Research                              | 2004 | 39        |
| Cooper, Md; Phillips, Ra                                       | Exploratory analysis of the safety climate and safety behavior relationship                                                                    | Journal of Safety Research                              | 2004 | 67        |
| Katz-Navon, T; Naveh, E; Stern, Z                              | Safety Climate in Health Care Organizations: A Multidimensional Approach                                                                       | Academy of Management Journal                           | 2005 | 25        |
| Colla, Jb; Bracken, Ac; Kinney, Lm; Weeks, Wb                  | Measuring patient safety climate: a review of surveys                                                                                          | Quality & Safety in Health Care                         | 2005 | 52        |
| Zohar, D; Luria, G                                             | A multilevel model of safety climate: cross-level relationships between organization and group-level climates                                  | Journal of Applied Psychology                           | 2005 | 128       |
| Hofmann, Da; Mark, B                                           | An investigation of the relationship between safety climate and medication errors as well as other nurse and patient outcomes                  | Personnel Psychology                                    | 2006 | 42        |
| Huang, Yh; Ho, M; Smith, Gs; Chen, Py; Mith, S                 | Safety climate and self-reported injury: assessing the mediating role of employee safety control                                               | Accident Analysis and Prevention                        | 2006 | 41        |
| Neal, A; Griffin, Ma                                           | A study of the lagged relationships among safety climate, safety motivation, safety behavior, and accidents at the individual and group levels | Journal of Applied Psychology                           | 2006 | 110       |
| Clarke, S                                                      | The relationship between safety climate and safety performance: a meta-analytic review                                                         | Journal of Occupational Health Psychology               | 2006 | 95        |
| Fang, Dp; Chen, Y; Wong, L                                     | Safety climate in construction industry: a case study in hong kong                                                                             | Journal of Construction Engineering and Management-ASCE | 2006 | 32        |
| Wallace, Jc; Popp, E; Mondore, S                               | Safety climate as a mediator between foundation climates and occupational accidents: a group-level investigation                               | Journal of Applied Psychology                           | 2006 | 25        |
| Flin, R; Burns, C; Mearns, K; Yule, S; Robertson, Em           | Measuring safety climate in health care                                                                                                        | Quality & Safety in Health Care                         | 2006 | 53        |
| Johnson, Se                                                    | The predictive validity of safety climate                                                                                                      | Journal of Safety Research                              | 2007 | 38        |
| Singer, S; Meterko, M; Baker, L; Gaba, D; Falwell, A; Rosen, A | Workforce perceptions of hospital safety culture: development and validation of the patient safety climate in healthcare organizations survey  | Health Services Research                                | 2007 | 31        |
| Hahn, Se; Murphy, Lr                                           | A short scale for measuring safety climate                                                                                                     | Safety Science                                          | 2008 | 27        |
| Dov, Z                                                         | Safety climate and beyond: a multi-level multi-climate framework                                                                               | Safety Science                                          | 2008 | 34        |
| Pousette, A; Larsson, S; Torner, M                             | Safety climate cross-validation, strength and prediction of safety behaviour                                                                   | Safety Science                                          | 2008 | 30        |
| Singer, S; Lin, S; Falwell, A; Gaba, D; Baker, L               | Relationship of safety climate and safety performance in hospitals                                                                             | Health Services Research                                | 2009 | 31        |

| Authors                                                            | Title                                                                                                                                             | Journal                                                         | Year | Cit_Score |
|--------------------------------------------------------------------|---------------------------------------------------------------------------------------------------------------------------------------------------|-----------------------------------------------------------------|------|-----------|
| Clarke, S                                                          | An integrative model of safety climate: linking psychological climate and work attitudes to individual safety outcomes using meta-analysis        | Journal of Occupational and Organizational Psychology           | 2010 | 41        |
| Dollard, Mf; Bakker, Ab                                            | Psychosocial safety climate as a precursor to conducive work environments, psychological health problems, and employee engagement                 | Journal of Occupational and Organizational Psychology           | 2010 | 35        |
| Hall, Gb; Dollard, Mf; Coward, J                                   | Psychosocial safety climate: development of the psc-12                                                                                            | International Journal of Stress Management                      | 2010 | 28        |
| Zohar, D                                                           | Thirty years of safety climate research: reflections and future directions                                                                        | Accident Analysis and Prevention                                | 2010 | 104       |
| Beus, Jm; Payne, Sc; Bergman, Me; Arthur, W                        | Safety climate and injuries: an examination of theoretical and empirical relationships                                                            | Journal of Applied Psychology                                   | 2010 | 63        |
| Law, R; Dollard, Mf; Tuckey, Mr; Dormann, C                        | Psychosocial safety climate as a lead indicator of workplace bullying and harassment, job resources, psychological health and employee engagement | Accident Analysis and Prevention                                | 2011 | 28        |
| Idris, Ma; Dollard, Mf; Coward, J; Dormann, C                      | Psychosocial safety climate: conceptual distinctiveness and effect on job demands and worker psychological health                                 | Safety Science                                                  | 2012 | 27        |
| Huang, Yh; Zohar, D; Robertson, Mm; Garabet, A; Lee, J; Murphy, La | Development and validation of safety climate scales for lone workers using truck drivers as exemplar                                              | Transportation Research Part F-Traffic Psychology and Behaviour | 2013 | 30        |

**Table S2.** Highest cited papers on safety culture (ranked by publication year).

| Authors                                                                                        | Title                                                                                                                                         | Journal                                     | Year | Cit_Score |
|------------------------------------------------------------------------------------------------|-----------------------------------------------------------------------------------------------------------------------------------------------|---------------------------------------------|------|-----------|
| Pidgeon, Nf                                                                                    | Safety culture and risk management in organizations                                                                                           | <i>Journal of Cross-Cultural Psychology</i> | 1991 | 28        |
| Ostrom, L; Wilhelmsen, C; Kaplan, B                                                            | Assessing safety culture                                                                                                                      | <i>Nuclear Safety</i>                       | 1993 | 16        |
| Cox, S; Flin, R                                                                                | Safety culture: philosopher's stone or man of straw?                                                                                          | Work and Stress                             | 1998 | 42        |
| Pidgeon, N                                                                                     | Safety culture: key theoretical issues                                                                                                        | Work and Stress                             | 1998 | 27        |
| Lee, T                                                                                         | Assessment of safety culture at a nuclear reprocessing plant                                                                                  | Work and Stress                             | 1998 | 22        |
| Mearns, Kj; Flin, R                                                                            | Assessing the state of organizational safety culture or climate?                                                                              | Current Psychology                          | 1999 | 14        |
| Clarke, S                                                                                      | Perceptions of organizational safety: implications for the development of safety culture                                                      | Journal of Organizational Behavior          | 1999 | 35        |
| Cooper, Md                                                                                     | Towards a model of safety culture                                                                                                             | Safety Science                              | 2000 | 88        |
| Grote, G; Kunzler, C                                                                           | Diagnosis of safety culture in safety management audits                                                                                       | Safety Science                              | 2000 | 27        |
| Lee, T; Harrison, K                                                                            | Assessing safety culture in nuclear power stations                                                                                            | Safety Science                              | 2000 | 28        |
| Cox, Sj; Cheyne, Ajt                                                                           | Assessing safety culture in offshore environments                                                                                             | Safety Science                              | 2000 | 27        |
| Guldenmund, Fw                                                                                 | The nature of safety culture: a review of theory and research                                                                                 | Safety Science                              | 2000 | 108       |
| Glendon, Ai; Stanton, Na                                                                       | Perspectives on Safety Culture                                                                                                                | Safety Science                              | 2000 | 36        |
| Sorensen, Jn                                                                                   | Safety culture: a survey of the state-of-the-art                                                                                              | Reliability Engineering & System Safety     | 2002 | 25        |
| Nieva, Vf; Sorra, J                                                                            | Safety culture assessment: a tool for improving patient safety in healthcare organizations                                                    | Quality & Safety in Health Care             | 2003 | 75        |
| Ginsburg, L; Norton, Pg; Casebeer, A; Lewis, S                                                 | An educational intervention to enhance nurse leaders' perceptions of patient safety culture                                                   | Health Services Research                    | 2005 | 14        |
| Pronovost, P; Sexton, B                                                                        | Assessing safety culture: guidelines and recommendations                                                                                      | Quality & Safety in Health Care             | 2005 | 50        |
| Handler, Sm; Castle, Ng; Studenski, Sa; Perera, S; Fridsma, Db; Nace, Da; T Hanlon, J          | Patient safety culture assessment in the nursing home                                                                                         | Quality & Safety in Health Care             | 2006 | 18        |
| Parker, D; Lawrie, M; Hudson, P                                                                | A framework for understanding the development of organisational safety culture                                                                | Safety Science                              | 2006 | 30        |
| Singer, S; Meterko, M; Baker, L; Gaba, D; Falwell, A; Rosen, A                                 | Workforce perceptions of hospital safety culture: development and validation of the patient safety climate in healthcare organizations survey | Health Services Research                    | 2007 | 15        |
| Choudhry, Ra; Fang, Dp; Mohamed, S                                                             | The nature of safety culture: a survey of the state-of-the-art                                                                                | <i>Safety Science</i>                       | 2007 | 37        |
| Kirk, S; Parker, D; Claridge, T; Esmail, A; Marshall, M                                        | Patient safety culture in primary care: developing a theoretical framework for practical use                                                  | Quality & Safety in Health Care             | 2007 | 31        |
| Flin, R                                                                                        | Measuring safety culture in healthcare: a case for accurate diagnosis                                                                         | Safety Science                              | 2007 | 35        |
| Guldenmund, Fw                                                                                 | The use of questionnaires in safety culture research - an evaluation                                                                          | Safety Science                              | 2007 | 32        |
| Huang, Dt; Clermont, G; Sexton, Jb; Karlo, Ca; Miller, Rg; Weissfeld, La; Rowan, Km; Angus, Dc | Perceptions of safety culture vary across the intensive care units of a single institution                                                    | Critical Care Medicine                      | 2007 | 31        |
| Modak, I; Sexton, Jb; Lux, Tr; Helmreich, Rl; Thomas, Ej                                       | Measuring safety culture in the ambulatory setting: the safety attitudes questionnaire-ambulatory version                                     | Journal of General Internal Medicine        | 2007 | 21        |
| Fernandez-Muniz, B; Montes-Peon, Jm; Vazquez-Ordas, Cj                                         | Safety culture: analysis of the causal relationships between its key dimensions                                                               | Journal of Safety Research                  | 2007 | 15        |

| Authors                                                                                       | Title                                                                                                                                                     | Journal                                          | Year | Cit_Score |
|-----------------------------------------------------------------------------------------------|-----------------------------------------------------------------------------------------------------------------------------------------------------------|--------------------------------------------------|------|-----------|
| Vogus, Tj; Sutcliffe, Km                                                                      | The safety organizing scale - development and validation of a behavioral measure of safety culture in hospital nursing units                              | Medical Care                                     | 2007 | 15        |
| Smits, M; Christiaans-Dingelhoff, I; Wagner, C; Van Der Wal, G; Groenewegen, Pp               | The psychometric properties of the 'hospital survey on patient safety culture' in dutch hospitals                                                         | BMC Health Services Research                     | 2008 | 52        |
| Bodur, S; Filiz, E                                                                            | A survey on patient safety culture in primary healthcare services in turkey                                                                               | International Journal for Quality in Health Care | 2009 | 32        |
| Smits, M; Wagner, C; Spreeuwenberg, P; Van Der Wal, G; Groenewegen, Pp                        | Measuring patient safety culture: an assessment of the clustering of responses at unit level and hospital level                                           | Quality & Safety in Health Care                  | 2009 | 27        |
| Wagner, Lm; Capezuti, E; Rice, Jc                                                             | Nurses' perceptions of safety culture in long-term care settings                                                                                          | Journal of Nursing Scholarship                   | 2009 | 15        |
| Pfeiffer, Y; Manser, T                                                                        | Development of the german version of the hospital survey on patient safety culture: dimensionality and psychometric properties                            | Safety Science                                   | 2010 | 25        |
| El-Jardali, F; Jaafar, M; Dimassi, H; Jamal, D; Hamdan, R                                     | The current state of patient safety culture in lebanese hospitals: a study at baseline                                                                    | International Journal for Quality in Health Care | 2010 | 36        |
| Alahmadi, Ha                                                                                  | Assessment of patient safety culture in saudi arabian hospitals                                                                                           | Quality & Safety in Health Care                  | 2010 | 17        |
| Waterson, P; Griffiths, P; Stride, C; Murphy, J; Hignett, S                                   | Psychometric properties of the hospital survey on patient safety culture: findings from the uk                                                            | Quality & Safety in Health Care                  | 2010 | 22        |
| Lee, Wc; Wung, Hy; Liao, Hh; Lo, Cm; Chang, Fl; Wang, Pc; Fan, A; Chen, Hh; Yang, Hc; Hou, Sm | Hospital safety culture in taiwan: a nationwide survey using chinese version safety attitude questionnaire                                                | BMC Health Services Research                     | 2010 | 18        |
| Sorra, Js; Dyer, N                                                                            | Multilevel psychometric properties of the ahrq hospital survey on patient safety culture                                                                  | BMC Health Services Research                     | 2010 | 64        |
| Chen, Ic; Li, Hh                                                                              | Measuring patient safety culture in taiwan using the hospital survey on patient safety culture (hsopsc)                                                   | BMC Health Services Research                     | 2010 | 36        |
| Huang, Dt; Clermont, G; Kong, L; Weissfeld, La; Sexton, Jb; Rowan, Km; Angus, Dc              | Intensive care unit safety culture and outcomes: a us multicenter study(dagger)                                                                           | International Journal for Quality in Health Care | 2010 | 26        |
| Bodur, S; Filiz, E                                                                            | Validity and reliability of turkish version of "hospital survey on patient safety culture" and perception of patient safety in public hospitals in turkey | BMC Health Services Research                     | 2010 | 30        |
| Sammer, Ce; Lykens, K; Singh, Kp; Mains, Da; Lackan, Na                                       | What is patient safety culture? A review of the literature                                                                                                | Journal of Nursing Scholarship                   | 2010 | 42        |
| Halligan, M; Zecevic, A                                                                       | Safety culture in healthcare: a review of concepts, dimensions, measures and progress                                                                     | BMJ Quality & Safety                             | 2011 | 29        |
| Sarac, C; Flin, R; Mearns, K; Jackson, J                                                      | Hospital survey on patient safety culture: psychometric analysis on a scottish sample                                                                     | BMJ Quality & Safety                             | 2011 | 17        |
| El-Jardali, F; Dimassi, H; Jamal, D; Jaafar, M; Hemadeh, N                                    | Predictors and outcomes of patient safety culture in hospitals                                                                                            | BMC Health Services Research                     | 2011 | 25        |
| Ito, S; Seto, K; Kigawa, M; Fujita, S; Hasegawa, T; Hasegawa, T                               | Development and applicability of hospital survey on patient safety culture (hsops) in japan                                                               | BMC Health Services Research                     | 2011 | 15        |
| Hamdan, M; Saleem, Aa                                                                         | Assessment of patient safety culture in palestinian public hospitals                                                                                      | International Journal for Quality in Health Care | 2013 | 15        |
| Morello, Rt; Lowthian, Ja; Barker, Al; McGinnes, R; Dunt, D; Brand, C                         | Strategies for improving patient safety culture in hospitals: a systematic review                                                                         | BMJ Quality & Safety                             | 2013 | 29        |
| Wagner, C; Smits, M; Sorra, J; Huang, Cc                                                      | Assessing patient safety culture in hospitals across countries                                                                                            | International Journal for Quality in Health Care | 2013 | 23        |
| Nie, Yl; Mao, Xy; Cui, H; He, Sh; Li, J; Zhang, Mm                                            | Hospital survey on patient safety culture in china                                                                                                        | BMC Health Services Research                     | 2013 | 19        |

**Table S3.** Process safety culture and food safety culture papers in citation network (ranked by publication year).

| Authors                                                                     | Title                                                                                                                                     | Source                                               | Year | Cit_Score |
|-----------------------------------------------------------------------------|-------------------------------------------------------------------------------------------------------------------------------------------|------------------------------------------------------|------|-----------|
| Process Safety Culture                                                      |                                                                                                                                           |                                                      |      |           |
| Frank, Wl                                                                   | Process safety culture in the ccps risk-based process safety model                                                                        | Process Safety Progress                              | 2007 | 6         |
| Sutton, Is                                                                  | Use root cause analysis to understand and improve process safety culture                                                                  | Process Safety Progress                              | 2008 | 2         |
| Kao, Cs; Lai, Wh; Chuang, Tf; Lee, Jc                                       | Safety culture factors, group differences, and risk perception in five petrochemical plants                                               | Process Safety Progress                              | 2008 | 5         |
| Mckay, M; Lacoursiere, Jp                                                   | Development of a process safety culture of chemical engineers                                                                             | Process Safety Progress                              | 2008 | 2         |
| Shirali, G; Mohammadfam, I; Motamedzade, M; Ebrahimipour, V; Moghimbeigi, A | Assessing resilience engineering based on safety culture and managerial factors                                                           | Process Safety Progress                              | 2012 | 2         |
| Wang, Ch; Liu, Yj                                                           | The dimensions and analysis of safety culture                                                                                             | Process Safety Progress                              | 2012 | 0         |
| Forest, Jj                                                                  | How to evaluate process safety culture                                                                                                    | Process Safety Progress                              | 2012 | 0         |
| Hendershot, Dc                                                              | Process safety management-you can't get it right without a good safety culture                                                            | Process Safety Progress                              | 2012 | 0         |
| Louvar, Jf                                                                  | How to communicate to create a safety culture and improve psm results                                                                     | Process Safety Progress                              | 2013 | 0         |
| O'neal, Aem; Clavaud, O                                                     | Process safety culture: a creative potential approach to extract more value from risk assessments                                         | Journal of Loss Prevention in The Process Industries | 2016 | 0         |
| Food Safety Culture                                                         |                                                                                                                                           |                                                      |      |           |
| Griffith, Cj                                                                | Do businesses get the food poisoning they deserve? The importance of food safety culture                                                  | British Food Journal                                 | 2010 | 6         |
| Griffith, Cj; Livesey, Km; Clayton, Da                                      | Food safety culture: the evolution of an emerging risk factor?                                                                            | British Food Journal                                 | 2010 | 7         |
| Griffith, Cj; Livesey, Km; Clayton, D                                       | The assessment of food safety culture                                                                                                     | British Food Journal                                 | 2010 | 10        |
| Powell, Da; Jacob, Cj; Chapman, Bj                                          | Enhancing food safety culture to reduce rates of foodborne illness                                                                        | Food Control                                         | 2011 | 9         |
| Seward, S; Dobmeier, N; Baron, M                                            | Assessing the food safety culture of a manufacturing facility                                                                             | Food Technology                                      | 2012 | 1         |
| Fatimah, Uzau; Strohbehn, Ch; Arendt, Sw                                    | An empirical investigation of food safety culture in onsite foodservice operations                                                        | Food Control                                         | 2014 | 4         |
| Jespersen, L; Griffiths, M; Maclaurin, T; Chapman, B; Wallace, Ca           | Measurement of food safety culture using survey and maturity profiling tools                                                              | Food Control                                         | 2016 | 7         |
| Nyarugwe, Sp; Linnemann, A; Hofstede, Gj; Fogliano, V; Luning, Pa           | Determinants for conducting food safety culture research                                                                                  | Trends in Food Science & Technology                  | 2016 | 3         |
| Baur, P; Getz, C; Sowerwine, J                                              | Contradictions, consequences and the human toll of food safety culture                                                                    | Agriculture and Human Values                         | 2017 | 0         |
| Griffith, Cj; Jackson, Lm; Lues, R                                          | The food safety culture in a large south african food service complex perspectives on a case study                                        | British Food Journal                                 | 2017 | 0         |
| Jespersen, L; Griffiths, M; Wallace, Ca                                     | Comparative analysis of existing food safety culture evaluation systems                                                                   | Food Control                                         | 2017 | 2         |
| Jespersen, L; Maclaurin, T; Vlerick, P                                      | Development and validation of a scale to capture social desirability in food safety culture                                               | Food Control                                         | 2017 | 1         |
| Nayak, R; Waterson, P                                                       | The assessment of food safety culture: an investigation of current challenges, barriers and future opportunities within the food industry | Food Control                                         | 2017 | 0         |

|                                                                 |                                                                                                                                                                                                                                       |                                     |      |   |
|-----------------------------------------------------------------|---------------------------------------------------------------------------------------------------------------------------------------------------------------------------------------------------------------------------------------|-------------------------------------|------|---|
| Jespersen, L; Wallace, Ca                                       | Triangulation and the importance of establishing valid methods for food safety culture evaluation                                                                                                                                     | Food Research International         | 2017 | 0 |
| De Boeck, E; Mortier, Av; Jacxsens, L; Dequidt, L; Vlerick, P   | Towards an extended food safety culture model: studying the moderating role of burnout and jobstress, the mediating role of food safety knowledge and motivation in the relation between food safety climate and food safety behavior | Trends in Food Science & Technology | 2017 | 1 |
| Nyarugwe, Sp; Linnemann, A; Nyanga, Lk; Fogliano, V; Luning, Pa | Food safety culture assessment using a comprehensive mixed-methods approach: a comparative study in dairy processing organisations in an emerging economy                                                                             | Food Control                        | 2018 | 0 |
